# Supplementary material for: Tensor-Decomposition-Based Unsupervised Feature Extraction in Single-Cell Multiomics Data Analysis
Source: MDPI journal article supplement (doi:10.3390/genes12091442), 2021-09-18
Supplement: s1 [file s1]

(A)

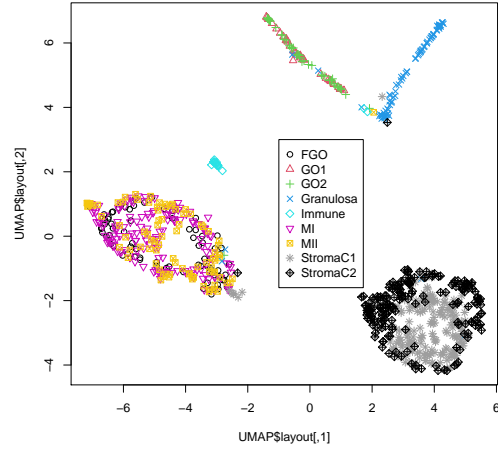

(B)

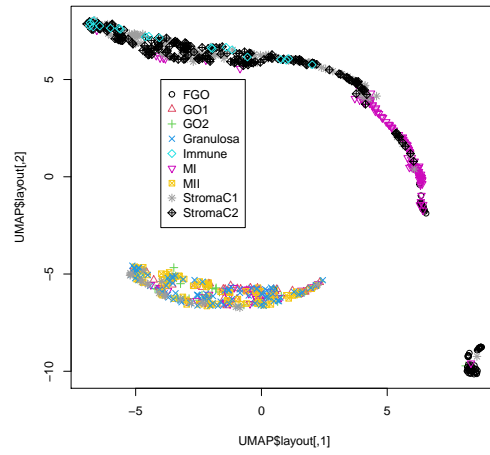

(C)

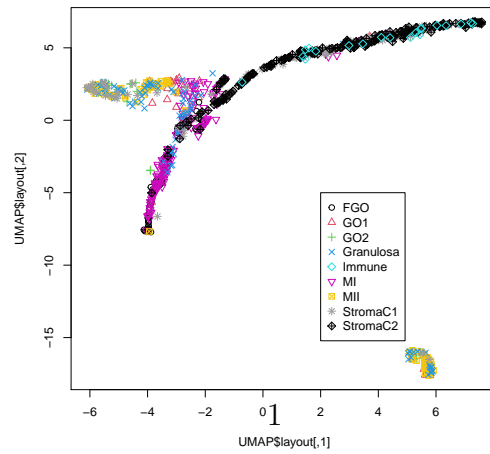

Figure S1: UMAP embedding of single omics data for data set 1. (A) gene expression (B) DNA methylation (C) DNA accessibility. Default setting other than `custom.config$n_neighbors=100` are used.

(A)

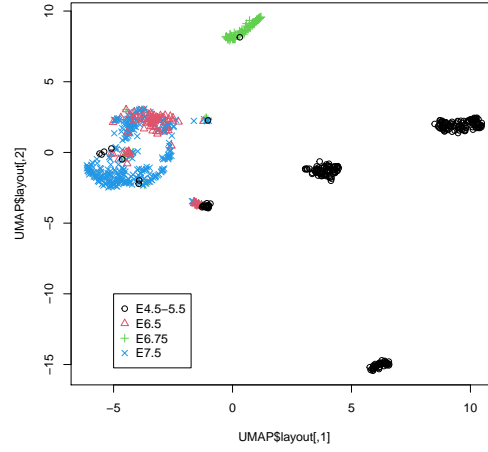

(B)

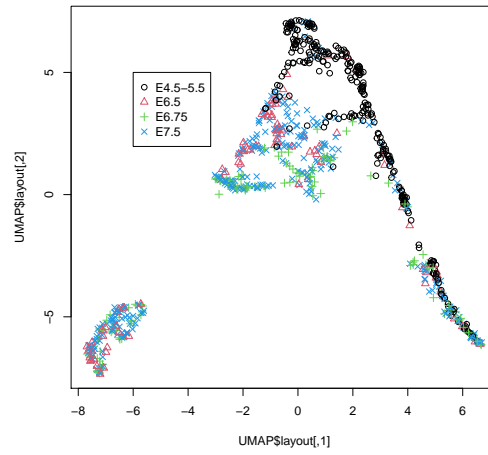

(C)

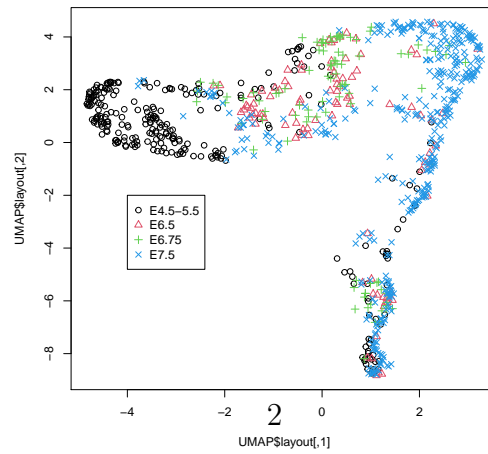

Figure S2: UMAP embedding of single omics data for data set 2. (A) gene expression (B) DNA methylation (C) DNA accessibility. Default setting other than `custom.config$n_neighbors=100` are used.

(A)

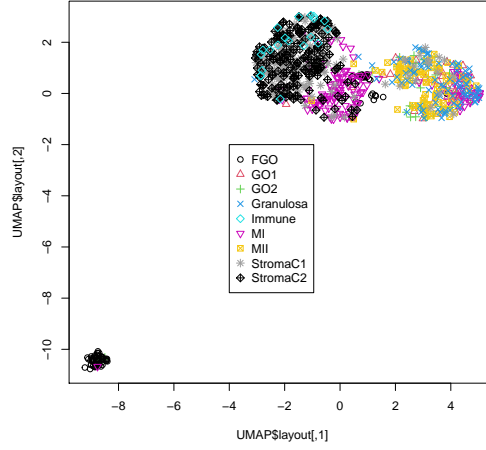

(B)

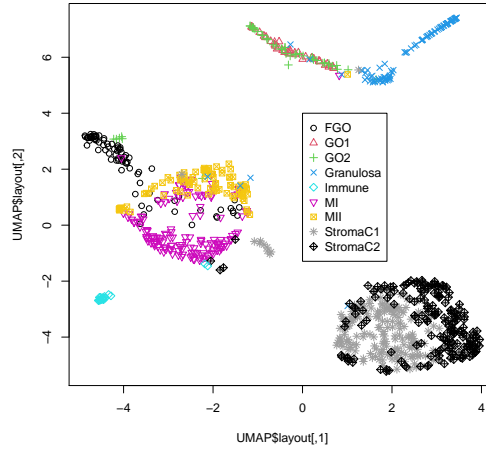

Figure S3: Two-dimensional embedding of singular value vectors,  $u_{\ell_2 j}$ , computed by HOSVD applied to  $x_{\ell j k}$  in dataset 1. (A)  $u_{\ell_2 j}$ ,  $1 \leq \ell_2 \leq 20$  when only gene expression and DNA methylation ( $k = 1, 2$ ) are integrated. (B)  $u_{\ell_2 j}$ ,  $1 \leq \ell_2 \leq 20$  when only gene expression and DNA accessibility ( $k = 1, 3$ ) are integrated. Default settings other than `custom.config$n_neighbors=100` were used.

(A)

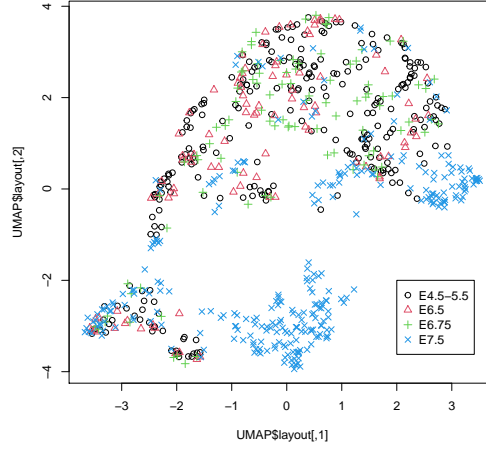

(B)

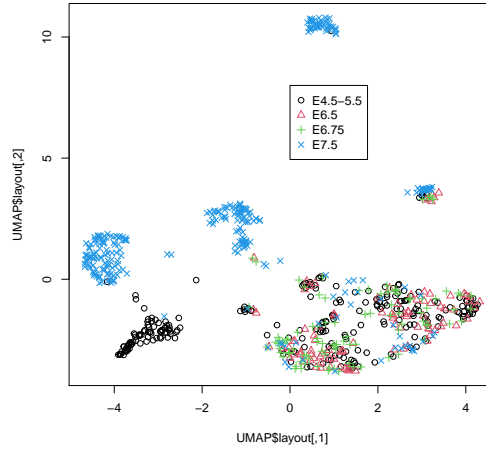

Figure S4: Two-dimensional embedding of singular value vectors,  $u_{\ell_2 j}$ , computed by HOSVD applied to  $x_{\ell j k}$  in dataset 2. (A)  $u_{\ell_2 j}$ ,  $1 \leq \ell_2 \leq 20$  when only gene expression and DNA methylation ( $k = 1, 2$ ) are integrated. (B)  $u_{\ell_2 j}$ ,  $1 \leq \ell_2 \leq 20$  when only gene expression and DNA accessibility ( $k = 1, 3$ ) are integrated. Default settings other than `custom.config$n_neighbors=100` were used.
